# Supplementary material
Source: Springer Nature journal article supplement (https://www.springermedizin.de/resource/supplementary/12936_2013_2964_MOESM6_ESM.pdf/9544742)
Supplement: MOESM6 [file 9544742]

**A**

Proportion free of malaria

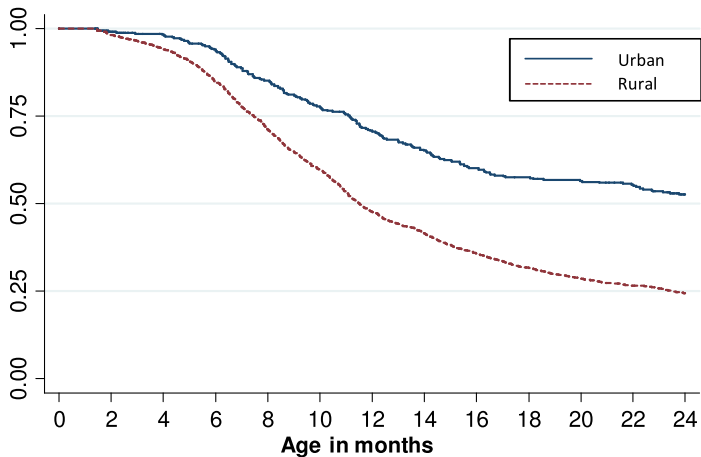**Number at risk**

|       |      |      |     |     |     |
|-------|------|------|-----|-----|-----|
| Urban | 406  | 372  | 273 | 218 | 164 |
| Rural | 2079 | 1760 | 980 | 639 | 448 |

**B**

Proportion free of malaria

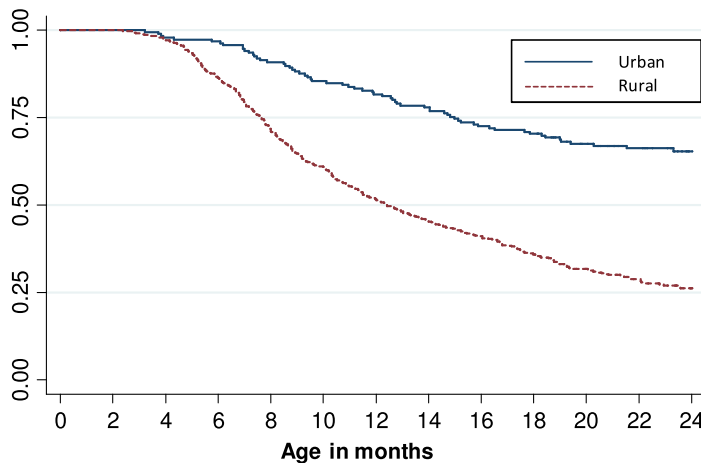**Number at risk**

|       |     |     |     |     |    |
|-------|-----|-----|-----|-----|----|
| Urban | 186 | 180 | 152 | 131 | 73 |
| Rural | 547 | 473 | 281 | 197 | 60 |
